# Supplementary material
Source: MDPI journal article supplement (https://www.mdpi.com/2227-7080/10/3/56)
Supplement: s1 [file s1]

# Electronic structure calculation of $\text{Cr}^{3+}$ and $\text{Fe}^{3+}$ in phosphor host materials based on relaxed structures by molecular dynamics simulation

Joichiro Ichikawa<sup>1</sup>, Hiroko Kominami<sup>2</sup>, Kazuhiko Hara<sup>3</sup>, Masato Kakihana<sup>4</sup> and Yuta Matsushima<sup>1,\*</sup>

<sup>1</sup> Chemistry and Chemical Engineering, Yamagata University, Yamagata 992-8510, Japan;

<sup>2</sup> Electronics and Materials Science, Shizuoka University, Shizuoka 432-8561, Japan;  
kominami.hiroko@shizuoka.ac.jp

<sup>3</sup> Research Institute of Electronics, Shizuoka University, Shizuoka 432-8011, Japan;  
hara.kazuhiko@shizuoka.ac.jp

<sup>4</sup> Institute of Scientific and Industrial Research, Osaka University, Osaka 567-0047, Japan;  
kakihana@sanken.osaka-u.ac.jp

\* Correspondence: ymatsush@yz.yamagata-u.ac.jp; Tel.: +81-238-26-3165

**Table S1.** Comparison of the lattice parameters simulated by MD using the potential parameters ( $A_{ij}$  and  $\rho_{ij}$ ) in **Table 1** with those experimentally determined (Exp.). MSD represents the “mean square displacement” in MD.

**Figure S1.** Crystal structures of (a)  $\text{LiAl}_5\text{O}_8$ , (b)  $\alpha\text{-Al}_2\text{O}_3$ , and (c)  $\gamma\text{-LiAlO}_2$ .

**Figure S2.** Emission and excitation spectra of (a)  $\text{LiAl}_5\text{O}_8\text{:Cr}^{3+}$ , (b)  $\alpha\text{-Al}_2\text{O}_3\text{:Cr}^{3+}$ , and (c)  $\gamma\text{-LiAlO}_2\text{:Fe}^{3+}$ .

**Figure S3.** Calculation clusters for isolated  $\text{Cr}^{3+}$  and  $\text{Fe}^{3+}$  in (a)  $\text{LiAl}_5\text{O}_8\text{:Cr}^{3+}$  [ $(\text{Li}_2\text{Al}_{10}\text{CrO}_{38})^{41-}$ ], (b)  $\alpha\text{-Al}_2\text{O}_3\text{:Cr}^{3+}$  [ $(\text{Al}_{13}\text{CrO}_{45})^{48-}$ ], and (c)  $\gamma\text{-LiAlO}_2\text{:Fe}^{3+}$  [ $(\text{Li}_9\text{Al}_6\text{FeO}_{32})^{34-}$ ].

**Figure S4.** The clusters for the calculation of the electronic interaction in the Fe–Fe pairs on (a) first-, (b) second-, and (c) third-nearest cation sites.

\*The crystal structures in **Figure S1** and the calculation clusters in **Figure S3** and **S4** are illustrated by VESTA [i].

i Momma, K.; Izumi, F. VESTA 3 for three-dimensional visualization of crystal, volumetric and morphology data. *J. Appl. Crystallogr.* **2011**, *44*, 1272-1276.

**Table S1** Comparison of the lattice parameters simulated by MD using the potential parameters ( $A_{ij}$  and  $\rho_{ij}$ ) in **Table 1** with those experimentally determined (Exp.). MSD represents the “mean square displacement” in MD.

| Material                                 | Method | Lattice parameter (Å)                                                             |               |                | MSD (Å <sup>2</sup> )              | Ref. |
|------------------------------------------|--------|-----------------------------------------------------------------------------------|---------------|----------------|------------------------------------|------|
|                                          |        | *The values in parentheses in the MD rows are difference (%) between Exp. and MD. |               |                |                                    |      |
|                                          |        | <i>a</i>                                                                          | <i>b</i>      | <i>c</i>       |                                    |      |
| $\alpha$ -Al <sub>2</sub> O <sub>3</sub> | Exp.   | 4.7540                                                                            | 4.7540        | 12.990         | –                                  | 21   |
|                                          | MD     | 4.76 (+0.13%)                                                                     | 4.75 (−0.08%) | 12.87 (−0.92%) | Al: 0.012<br>O: 0.006              | –    |
| Li <sub>2</sub> O                        | Exp.   | 4.610                                                                             | 4.610         | 4.610          | –                                  | 24   |
|                                          | MD     | 4.67 (+1.30%)                                                                     | 4.67 (+1.30%) | 4.67 (+1.30%)  | Li: 0.025<br>O: 0.013              | –    |
| $\alpha$ -LiAlO <sub>2</sub>             | Exp.   | 2.8003                                                                            | 2.8003        | 14.216         | –                                  | 25   |
|                                          | MD     | 2.85 (+1.77%)                                                                     | 2.85 (+1.77%) | 14.48 (+1.86%) | Al: 0.008<br>Li: 0.029<br>O: 0.015 | –    |
| $\gamma$ -LiAlO <sub>2</sub>             | Exp.   | 5.1687                                                                            | 5.1687        | 6.2679         | –                                  | 22   |
|                                          | MD     | 5.23 (+1.19%)                                                                     | 5.23 (+1.19%) | 6.22 (−0.76%)  | Al: 0.007<br>Li: 0.032<br>O: 0.037 | –    |
| LiAl <sub>5</sub> O <sub>8</sub>         | Exp.   | 7.908                                                                             | 7.908         | 7.908          | –                                  | 20   |
|                                          | MD     | 7.87 (−0.48%)                                                                     | 7.87 (−0.48%) | 7.87 (−0.48%)  | Al: 0.006<br>Li: 0.011<br>O: 0.010 | –    |
| Cr <sub>2</sub> O <sub>3</sub>           | Exp.   | 4.9507                                                                            | 4.9507        | 13.5656        | –                                  | 26   |
|                                          | MD     | 4.94 (−0.22%)                                                                     | 4.94 (−0.22%) | 13.37 (−1.44%) | Cr: 0.034<br>O: 0.008              | –    |
| LiCrO <sub>2</sub>                       | Exp.   | 2.9010                                                                            | 2.9010        | 14.4311        | –                                  | 27   |
|                                          | MD     | 2.95 (+1.69%)                                                                     | 2.95 (+1.69%) | 14.62 (+1.31%) | Cr: 0.006<br>Li: 0.029<br>O: 0.031 | –    |
| Fe <sub>2</sub> O <sub>3</sub>           | Exp.   | 5.0355                                                                            | 5.0355        | 13.7471        | –                                  | 28   |
|                                          | MD     | 5.01 (−0.51%)                                                                     | 5.02 (−0.31%) | 13.49 (−1.87%) | Fe: 0.013<br>O: 0.009              | –    |
| LiFe <sub>5</sub> O <sub>8</sub>         | Exp.   | 8.319                                                                             | 8.319         | 8.319          | –                                  | 29   |
|                                          | MD     | 8.25 (−0.83%)                                                                     | 8.25 (−0.83%) | 8.25 (−0.83%)  | Fe: 0.018<br>Li: 0.023<br>O: 0.036 | –    |

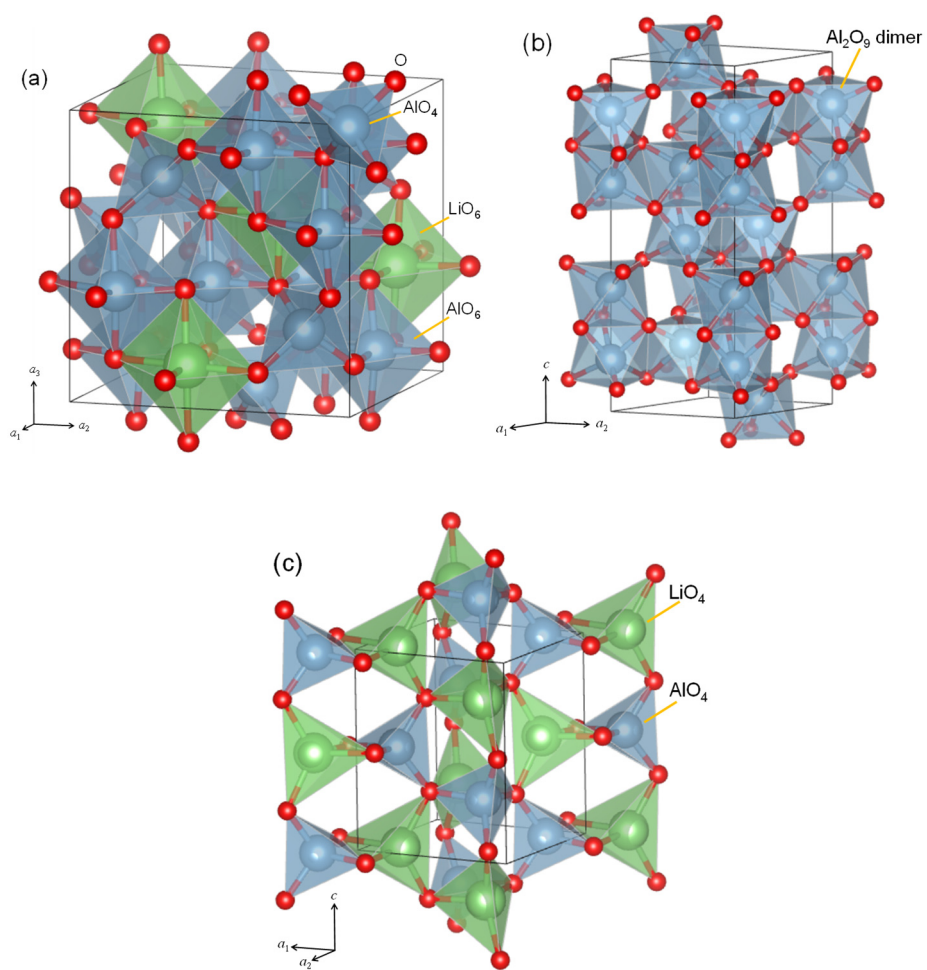

**Figure S1.** Crystal structures of (a)  $\text{LiAl}_5\text{O}_8$ , (b)  $\alpha\text{-Al}_2\text{O}_3$ , and (c)  $\gamma\text{-LiAlO}_2$ .

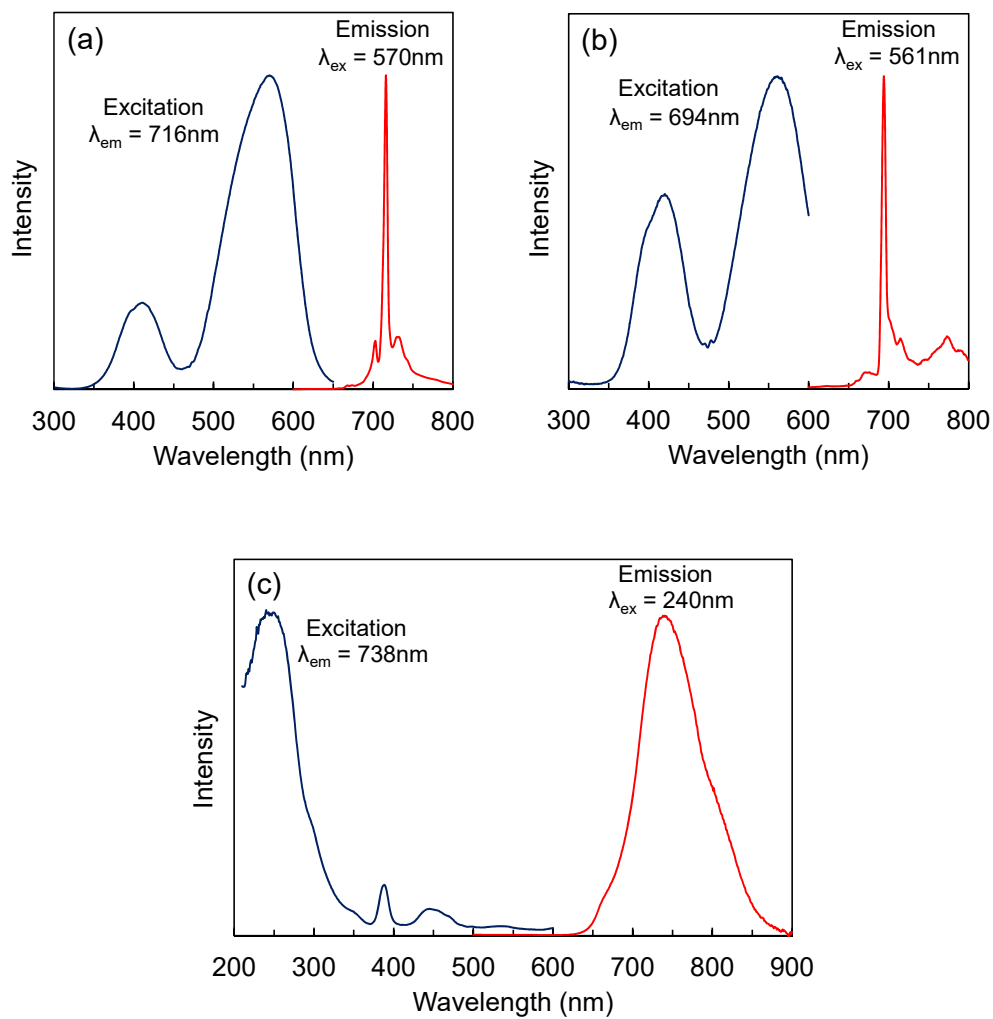

**Figure S2.** Emission and excitation spectra of (a)  $\text{LiAl}_5\text{O}_8:\text{Cr}^{3+}$ , (b)  $\alpha\text{-Al}_2\text{O}_3:\text{Cr}^{3+}$ , and (c)  $\gamma\text{-LiAlO}_2:\text{Fe}^{3+}$ .

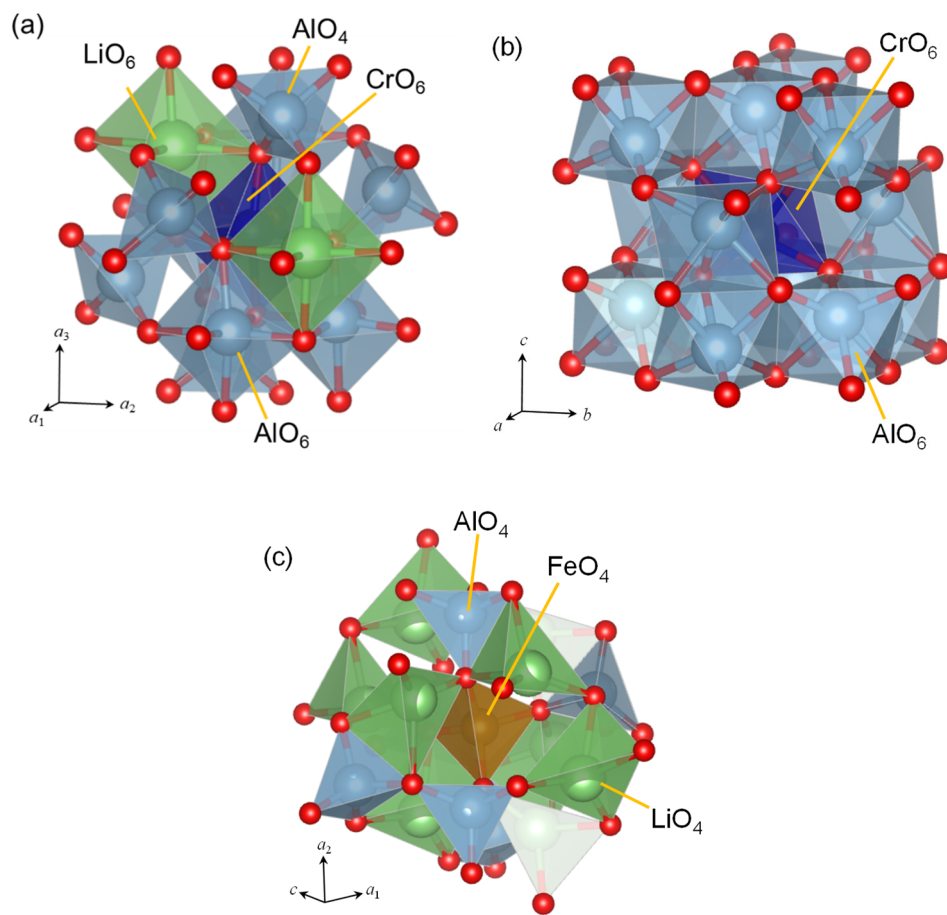

**Figure S3.** Calculation clusters for isolated  $\text{Cr}^{3+}$  and  $\text{Fe}^{3+}$  in (a)  $\text{LiAl}_5\text{O}_8:\text{Cr}^{3+}$   $[(\text{Li}_2\text{Al}_{10}\text{CrO}_{38})^{41-}]$ , (b)  $\alpha\text{-Al}_2\text{O}_3:\text{Cr}^{3+}$   $[(\text{Al}_{13}\text{CrO}_{45})^{48-}]$ , and (c)  $\gamma\text{-LiAlO}_2:\text{Fe}^{3+}$   $[(\text{Li}_9\text{Al}_6\text{FeO}_{32})^{34-}]$ .

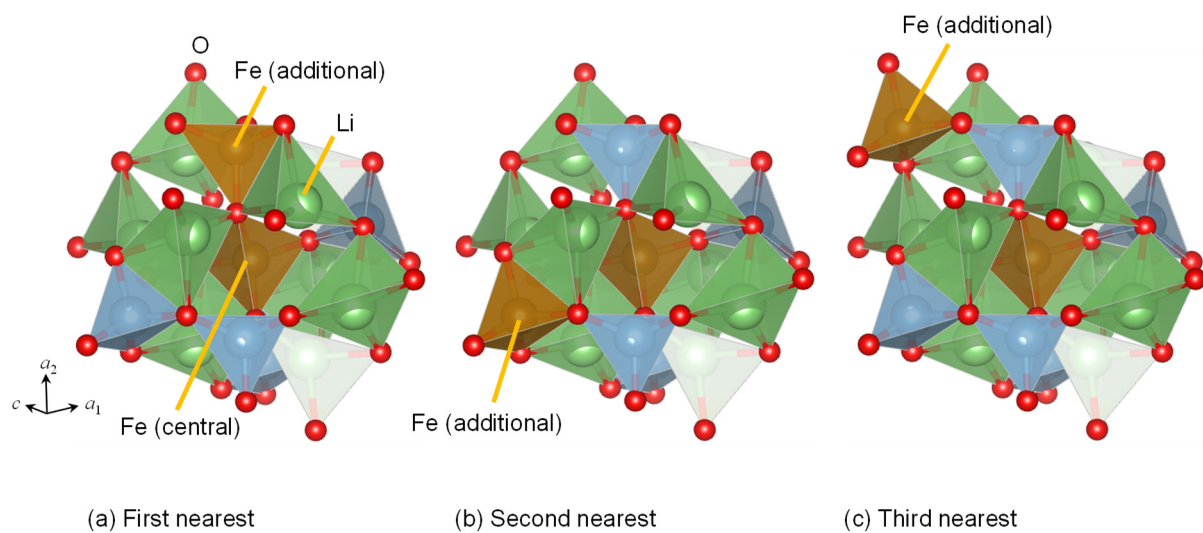

**Figure S4.** The clusters for the calculation of the electronic interaction in the Fe–Fe pairs on (a) first-, (b) second-, and (c) third-nearest cation sites.
